# Supplementary material
Source: PubMed Central journal article supplement (PMC6346745)
Supplement: NIHMS1510454-supplement-1.pdf [file NIHMS1510454-supplement-1.pdf]

## **Supplementary Information Guide**

Following Data are presented in Supplementary Information.

**Supplementary Data Figure 1** presents Source Gel data.

**Supplementary Data Table 1** includes sequences of all inserted DNA. For every insertion case, the following information is included: case number, name of the strain where insertion was identified, insertion sequence, insertion size, number of donors (complex events have more than one source of inserted DNA), donor chromosome, general feature of donor DNA (e.g. rDNA, Ty1), SGD link to the sequence inserted, end points nucleotide numbers of the inserted DNA, microhomology and its size at both junctions, changes of DSB ends, microhomology between donors for complex events, and the DNA sequences surrounding donor sequence at its original locus (15 nts upstream and downstream).

**Supplementary Data Table 2** includes the names and genotypes of all strains used in this study.
