# Supplementary material
Source: PubMed Central journal article supplement (PMC6346745)
Supplement: NIHMS1510454-supplement-2.pdf [file NIHMS1510454-supplement-2.pdf]

Gel source picture for Extended Fig. 1a. EtBr stained gel

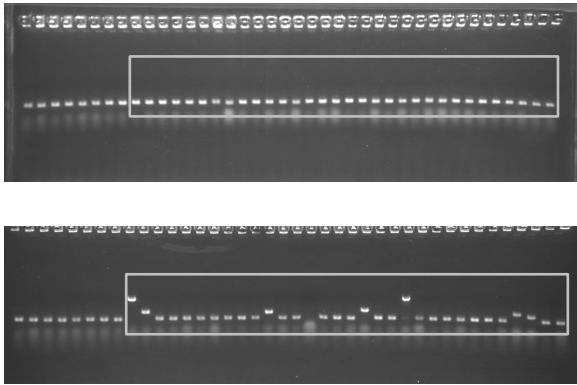

Southern blot source picture for Figure 2c

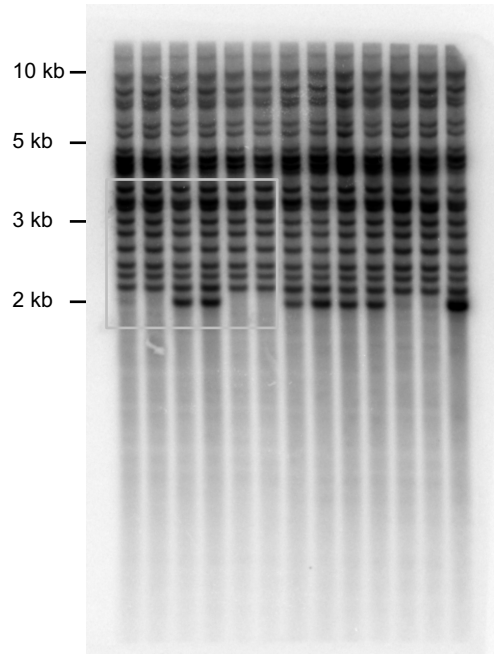

Gel source picture for Extended Fig. 1d  
EtBr stained gel

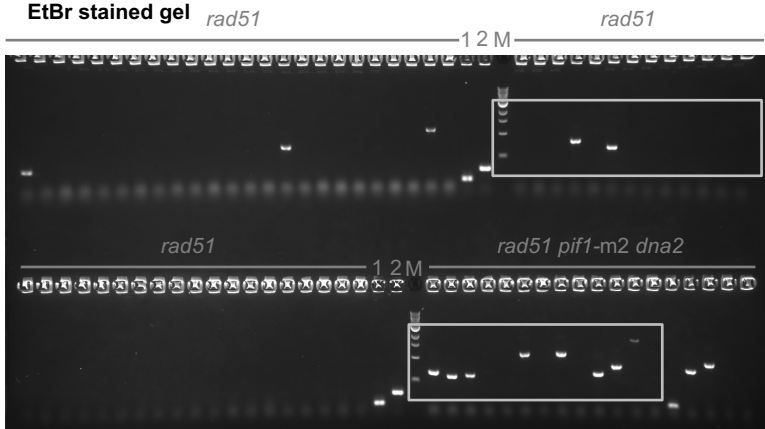

Note: 1 and 2 are two control samples. 1, without HO cleavage site in ACT1 intron. 2, with HO cleavage site in ACT1 intron. M, 1 kb DNA Ladder (the size of band from lower to upper: 0.5 kb, 1 kb, 1.5 kb, 2 kb, 3 kb, 4 kb, 5 kb, 6 kb, 8 kb, 10kb)

Northern blot source picture for Extended Fig. 3b

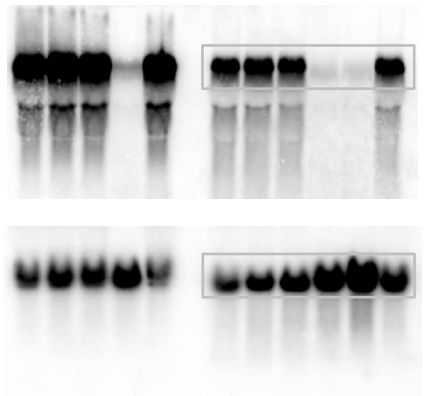

Southern blot source picture for Extended Fig. 3a

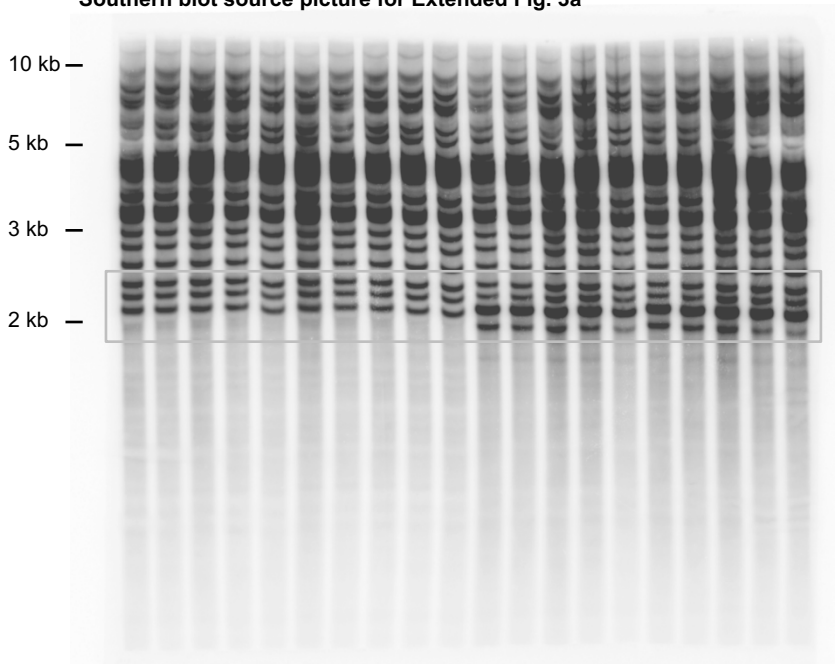

**Supplementary Table 2. List of strains used in this study.**

| Strain name | Parental strain | Genotype                                                                                                             | Source                      |
|-------------|-----------------|----------------------------------------------------------------------------------------------------------------------|-----------------------------|
| JKM139      |                 | DELho <i>hml::ADE1 MATa hmr::ADE1 ade1 leu2-3,112 lys5 trp1::hisG ura3-52 ade3::GAL10::HO</i>                        | <sup>1</sup>                |
| yYY349      | JKM139          | <i>pif1-m2</i>                                                                                                       | this study                  |
| yWH475      | JKM139          | <i>pif1-m2 dna2::kanMX</i>                                                                                           | <sup>2</sup>                |
| yNP331      | JKM139          | <i>pif1-m2 dna2R1253Q</i>                                                                                            | this study                  |
| yNP490      | JKM139          | <i>pif1-m2 dna2E675A</i>                                                                                             | this study                  |
| yWH811      | JKM139          | <i>yku70::kanMX pif1-m2 dna2::URA3</i>                                                                               | <sup>3</sup>                |
| yYY393      | JKM139          | <i>lig4::klTRP1 pif1-m2 dna2::kanMX</i>                                                                              | this study                  |
| yYY360      | JKM139          | <i>pol4::klTRP1 pif1-m2 dna2::kanMX</i>                                                                              | this study                  |
| yYY381      | JKM139          | <i>rad51::natMX pif1-m2 dna2::kanMX</i>                                                                              | this study                  |
| yAP481      | JKM139          | <i>rad51::kanMX</i>                                                                                                  | this study                  |
| yNP590      | JKM139          | <i>rad52::kanMX pif1-m2 dna2::kanMX</i>                                                                              | this study                  |
| yAP485      | JKM139          | <i>rad52::kanMX</i>                                                                                                  | this study                  |
| yYY356      | JKM139          | <i>spt3::klTRP1 pif1-m2 dna2::kanMX</i>                                                                              | this study                  |
| yYY398      | JKM139          | <i>rad27::klTRP1</i>                                                                                                 | this study                  |
| yGI200      | JKM139          | <i>sgs1::kanMX</i>                                                                                                   | <sup>2</sup>                |
| yGI198      | JKM139          | <i>exo1::TRP1</i>                                                                                                    | <sup>2</sup>                |
| yYY408      | JKM139          | <i>fob1::klTRP1 pif1-m2 dna2::kanMX</i>                                                                              | this study                  |
| yYY389      | JKM139          | <i>pif1::kanMX pol32::natMX dna2::klTRP1</i>                                                                         | this study                  |
| yYY382      | JKM139          | <i>mus81::natMX pif1-m2 dna2::kanMX</i>                                                                              | this study                  |
| yYY392      | JKM139          | <i>slx1::klTRP1 pif1-m2 dna2::kanMX</i>                                                                              | this study                  |
| yYY430      | JKM139          | <i>mus81::natMX pif1-m2 dna2E675A</i>                                                                                | this study                  |
| yNP98       | JKM139          | <i>yen1<sup>ON</sup></i>                                                                                             | this study                  |
| yNP128      | JKM139          | <i>yen1<sup>ON</sup> dna2::kanMX</i>                                                                                 | this study                  |
| yYY422      | JKM139          | <i>pif1-m2 yen1<sup>ON</sup> dna2::kanMX</i>                                                                         | this study                  |
| DG1657      |                 | <i>MATa ura3-167 his3Δ-200 trp1-hisG leu2-hisG Ty1-270his3-AI Ty1-588neo Ty1-146[tyb1::lacZ]</i>                     | <sup>4</sup>                |
| yNP495      | DG1657          | <i>pif1-m2</i>                                                                                                       | this study                  |
| yNP503      | DG1657          | <i>pif1-m2 dna2::URA3</i>                                                                                            | this study                  |
| yNP513      | DG1657          | <i>spt3::klTRP1 pif1-m2 dna2::URA3</i>                                                                               | this study                  |
| yYY379      |                 | DELho <i>hml::ADE1 MATa::hphMX hmr::ADE1 ade1 leu2-3,112 lys5 trp1::hisG URA3::ACT1 intron::HOcs ade3::GAL10::HO</i> | this study and <sup>5</sup> |
| yYY395      | yYY379          | <i>rad51::natMX</i>                                                                                                  | this study                  |
| yYY396      | yYY379          | <i>rad51::natMX pif1-m2</i>                                                                                          | this study                  |
| yYY397      | yYY379          | <i>rad51::natMX pif1-m2 dna2::kanMX</i>                                                                              | this study                  |
| yYY457      | JKM139          | <i>MATa-inc bRA77-LYS2-2<sup>w</sup></i>                                                                             | this study                  |
| yYY459      | JKM139          | <i>MATa-inc bRA77-LYS2-2<sup>w</sup> pif1-m2 dna2::kanMX</i>                                                         | this study                  |

- 1 Moore, J. K. & Haber, J. E. Cell cycle and genetic requirements of two pathways of nonhomologous end-joining repair of double-strand breaks in *Saccharomyces cerevisiae*. *Mol Cell Biol* **16**, 2164-2173 (1996).
- 2 Zhu, Z., Chung, W. H., Shim, E. Y., Lee, S. E. & Ira, G. Sgs1 helicase and two nucleases dna2 and exo1 resect DNA double-strand break ends. *Cell* **134**, 981-994 (2008).
- 3 Shim, E. Y. *et al.* *Saccharomyces cerevisiae* Mre11/Rad50/Xrs2 and Ku proteins regulate association of Exo1 and Dna2 with DNA breaks. *EMBO J* **29**, 3370-3380, doi:[emboj2010219](https://doi.org/10.1038/emboj.2010.219) [pii] [10.1038/emboj.2010.219](https://doi.org/10.1038/emboj.2010.219) (2010).
- 4 Sundararajan, A., Lee, B. S. & Garfinkel, D. J. The Rad27 (Fen-1) nuclease inhibits Ty1 mobility in *Saccharomyces cerevisiae*. *Genetics* **163**, 55-67 (2003).
- 5 Yu, X. & Gabriel, A. Patching broken chromosomes with extranuclear cellular DNA. *Mol Cell* **4**, 873-881 (1999).
